# Supplementary material for: Novel sunlight-driven Cu7S4/VO2 composite films for smart windows
Source: Royal Society of Chemistry journal article supplement (doi:10.1039/d3tc03774f), 2024-01-01
Supplement: d3tc03774f1.pdf [file d3tc03774f1.pdf]

# Novel Sunlight-driven $\text{Cu}_7\text{S}_4/\text{VO}_2$ Composite Films for Smart Windows

Yong Zhao, Haining Ji\*, Yangyong Ou, Yi Wang, Yongxing  
Chen, Jundong Tao, Bin Liu, Mingying Lu, Yan Huang, Junlong  
Wang

School of Physics and Optoelectronics, Xiangtan University, Xiangtan, Hunan  
411105, P. R. China

sdytjhn@126.com

Table S1 Optical properties of randomly arranged VO<sub>2</sub> particle films with different thicknesses

| Thickness (nm) | $T_{lum}(25\text{ }^{\circ}\text{C})$ | $T_{lum}(70\text{ }^{\circ}\text{C})$ | $T_{sol}(25\text{ }^{\circ}\text{C})$ | $T_{sol}(70\text{ }^{\circ}\text{C})$ | $\Delta T_{sol}$ |
|----------------|---------------------------------------|---------------------------------------|---------------------------------------|---------------------------------------|------------------|
| 200            | 77.1%                                 | 71.7%                                 | 80.0%                                 | 70.2%                                 | 9.8%             |
| 400            | 66.3%                                 | 56.9%                                 | 71.5%                                 | 54.1%                                 | 17.4%            |
| 600            | 53.9%                                 | 43.2%                                 | 62.7%                                 | 40.9%                                 | 21.8%            |
| 800            | 45.7%                                 | 34.5%                                 | 56.7%                                 | 32.5%                                 | 24.2%            |
| 1000           | 38.0%                                 | 27.2%                                 | 50.0%                                 | 24.9%                                 | 25.1%            |

Table S2 Optical properties of 600 nm VO<sub>2</sub> films with different VO<sub>2</sub> contents

| Different VO <sub>2</sub> contents | $T_{lum}(25\text{ }^{\circ}\text{C})$ | $T_{lum}(70\text{ }^{\circ}\text{C})$ | $T_{sol}(25\text{ }^{\circ}\text{C})$ | $T_{sol}(70\text{ }^{\circ}\text{C})$ | $\Delta T_{sol}$ |
|------------------------------------|---------------------------------------|---------------------------------------|---------------------------------------|---------------------------------------|------------------|
| 6.75v%                             | 65.5%                                 | 58.4%                                 | 72.3%                                 | 55.2%                                 | 17.1%            |
| 7.50v%                             | 63.1%                                 | 53.5%                                 | 70.5%                                 | 52.0%                                 | 18.5%            |
| 8.25v%                             | 60.4%                                 | 50.7%                                 | 68.5%                                 | 49.3%                                 | 19.2%            |
| 9.00v%                             | 58.0%                                 | 48.3%                                 | 66.6%                                 | 46.7%                                 | 19.9%            |
| 9.75v%                             | 56.8%                                 | 46.9%                                 | 65.6%                                 | 45.2%                                 | 20.4%            |

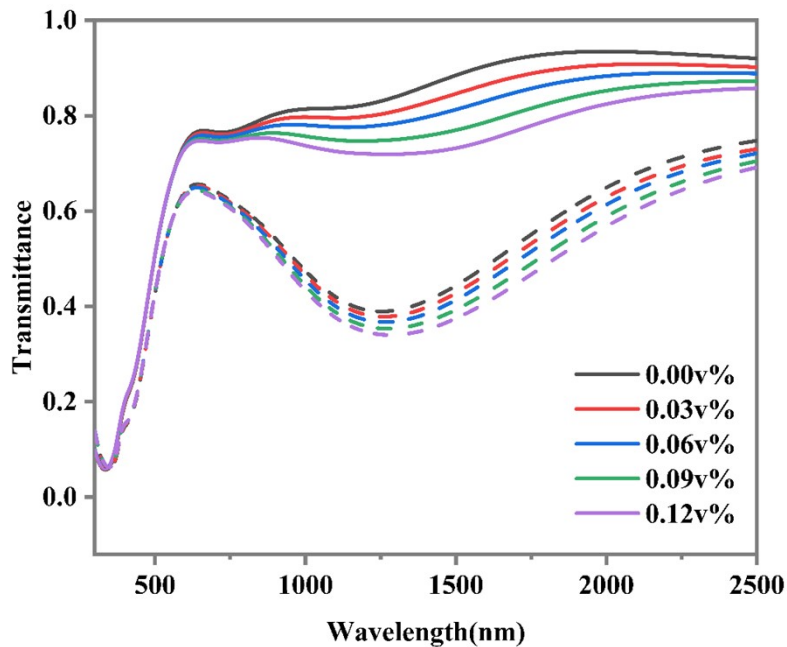

Figure S1 Transmission curves of VO<sub>2</sub> composite films with different Cu<sub>7</sub>S<sub>4</sub> contents (solid line at 25 °C, dashed line at 70 °C)

Table S3 Optical properties of 600 nm composite films with different Cu<sub>7</sub>S<sub>4</sub> contents

| Different Cu <sub>7</sub> S <sub>4</sub> contents | $T_{lum}(25\text{ }^{\circ}\text{C})$ | $T_{lum}(70\text{ }^{\circ}\text{C})$ | $T_{sol}(25\text{ }^{\circ}\text{C})$ | $T_{sol}(70\text{ }^{\circ}\text{C})$ | $\Delta T_{sol}$ |
|---------------------------------------------------|---------------------------------------|---------------------------------------|---------------------------------------|---------------------------------------|------------------|
| 0.00v%                                            | 60.4%                                 | 50.7%                                 | 68.5%                                 | 49.3%                                 | 19.2%            |
| 0.03v%                                            | 60.2%                                 | 50.6%                                 | 67.5%                                 | 48.9%                                 | 18.6%            |
| 0.06v%                                            | 60.1%                                 | 50.5%                                 | 66.7%                                 | 48.3%                                 | 18.4%            |
| 0.09v%                                            | 59.8%                                 | 50.3%                                 | 65.5%                                 | 47.6%                                 | 17.9%            |
| 0.12v%                                            | 59.7%                                 | 50.2%                                 | 64.5%                                 | 47.0%                                 | 17.5%            |
